# Supplementary material
Source: PubMed Central journal article supplement (PMC2758803)

**A**

Cycloheximide

Ethanol

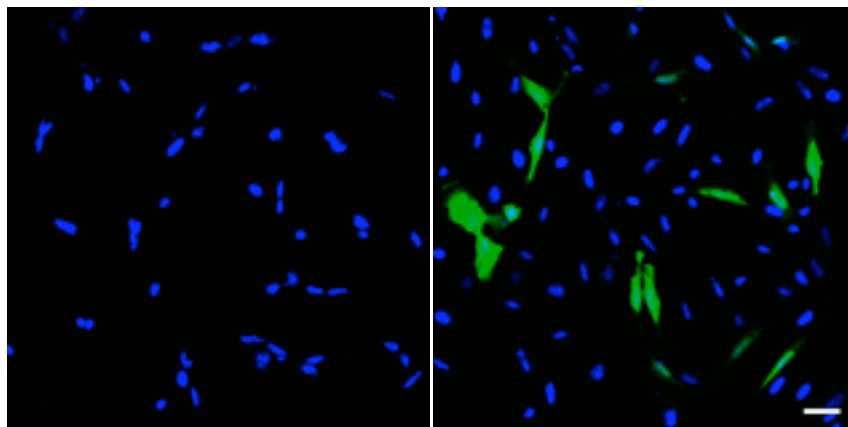**B**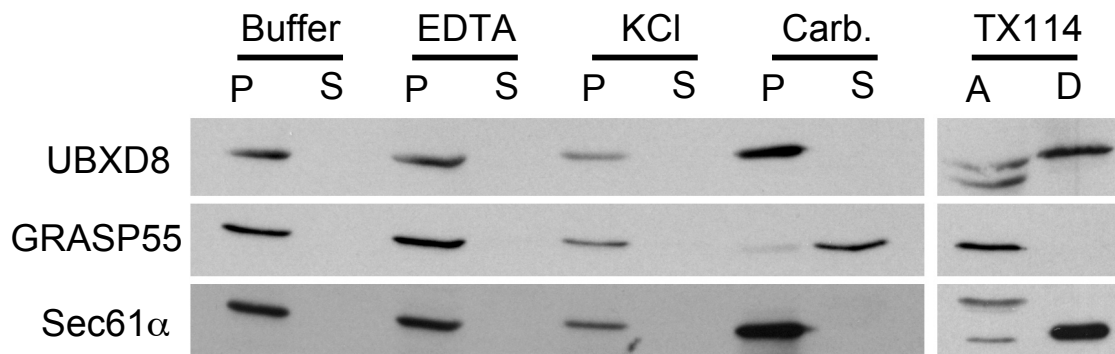

Supplement: supp_122_20_3694__1.pdf [file supp_122_20_3694__1.pdf]
